# Supplementary material for: Analysis of the Spatial and Temporal Distribution of the 2011 Earthquakes in Lake Van Area and Rupture Complexity of the Aftershock Sequence in Eastern Anatolia, Turkey
Source: Preprints.org preprint supplement (doi:10.20944/preprints201806.0466.v1), 2018-06-28
Supplement: Supplementary file 1 [file supplementary]

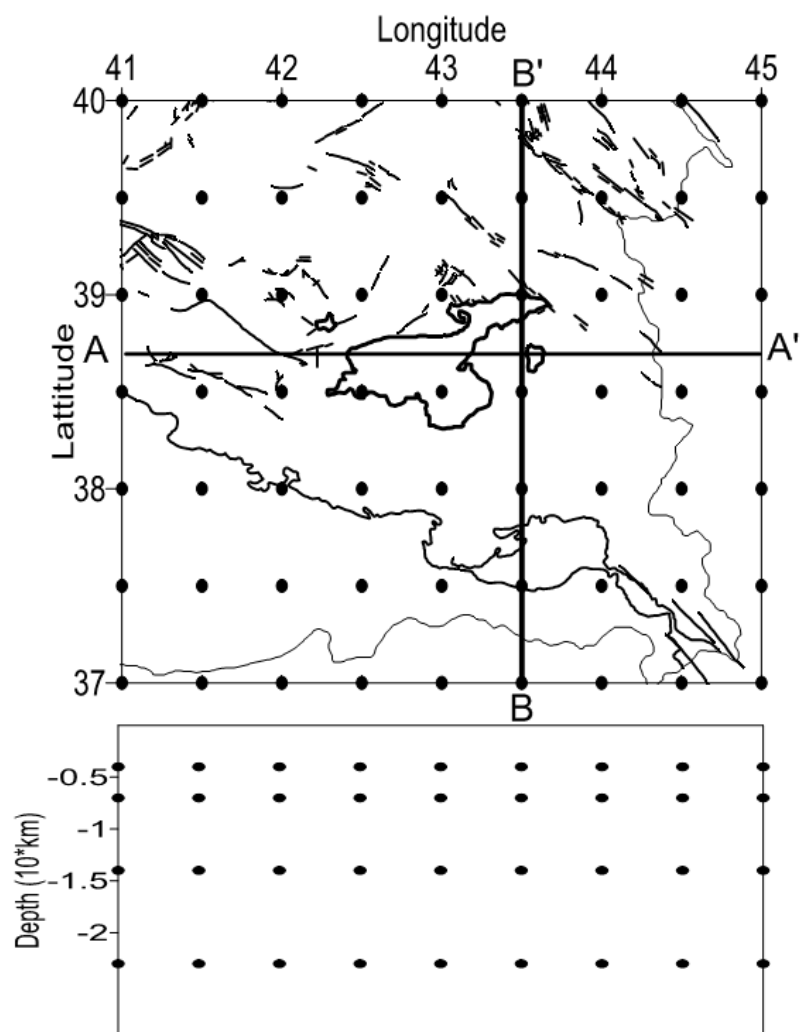

1. Grid Net

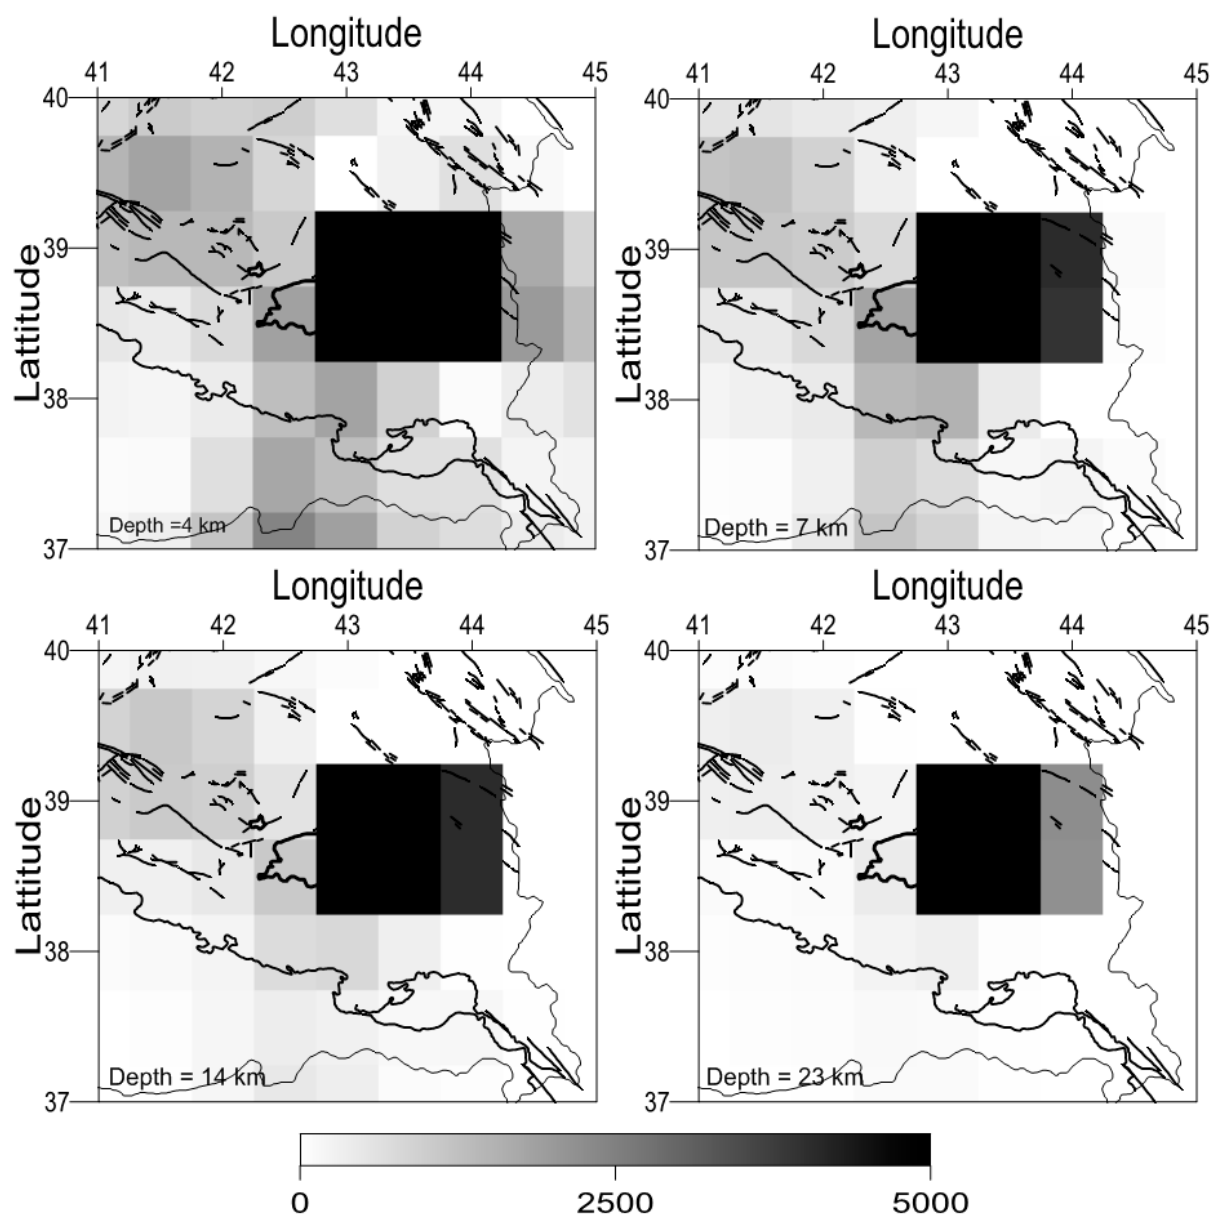

## 2. Number of rays passing through each grid node for P-wave

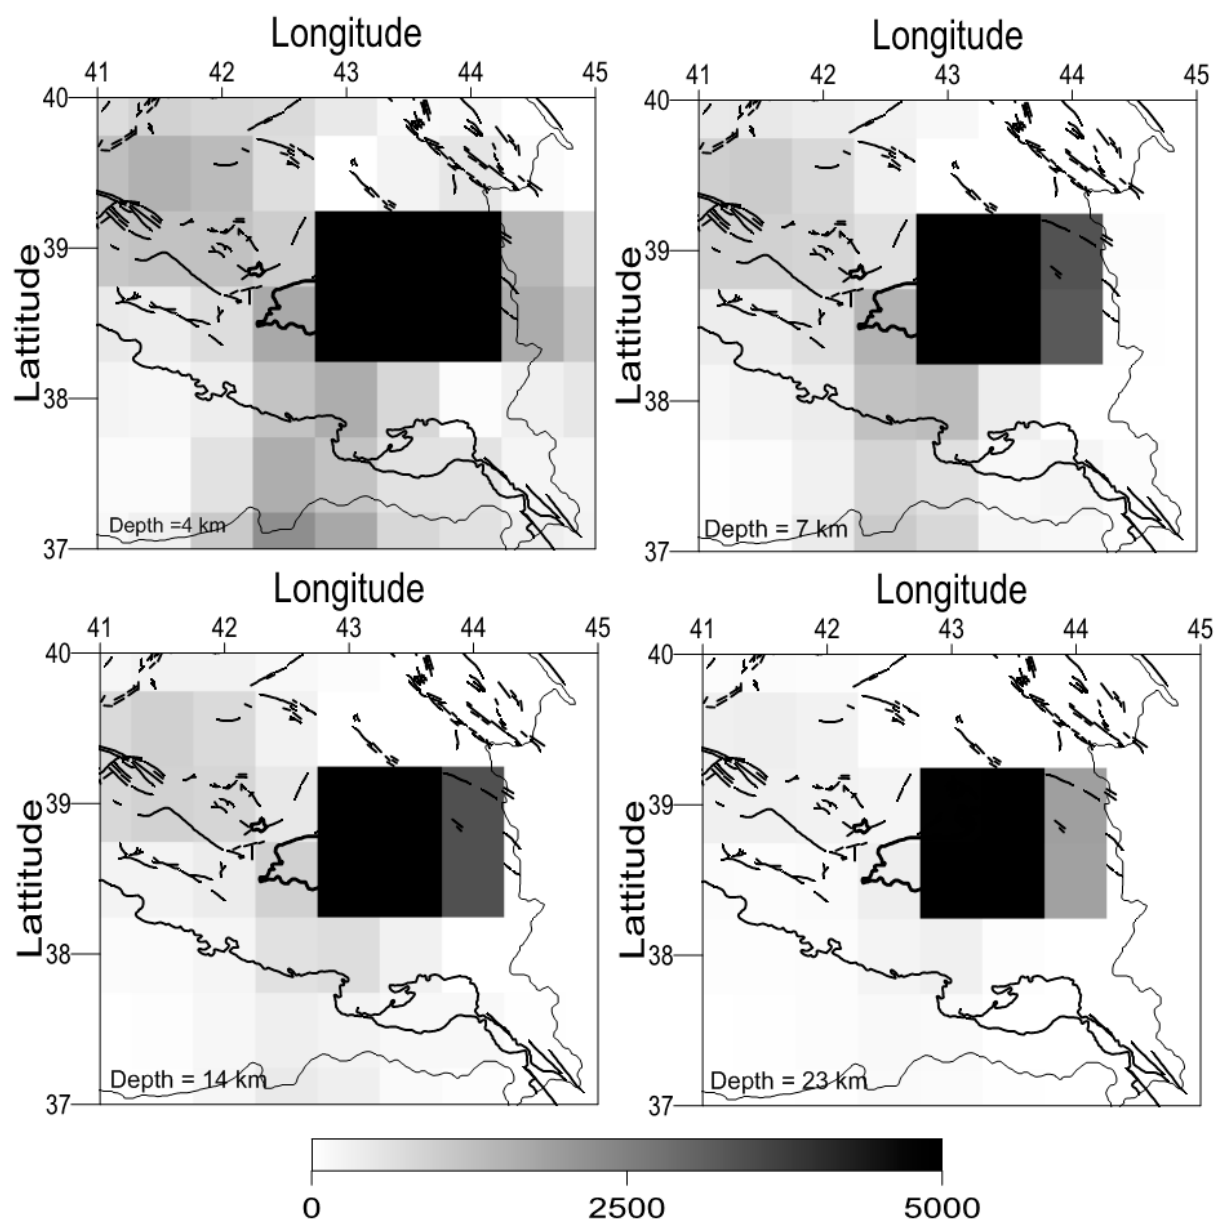

3. Number of rays passing through each grid node for S-wave

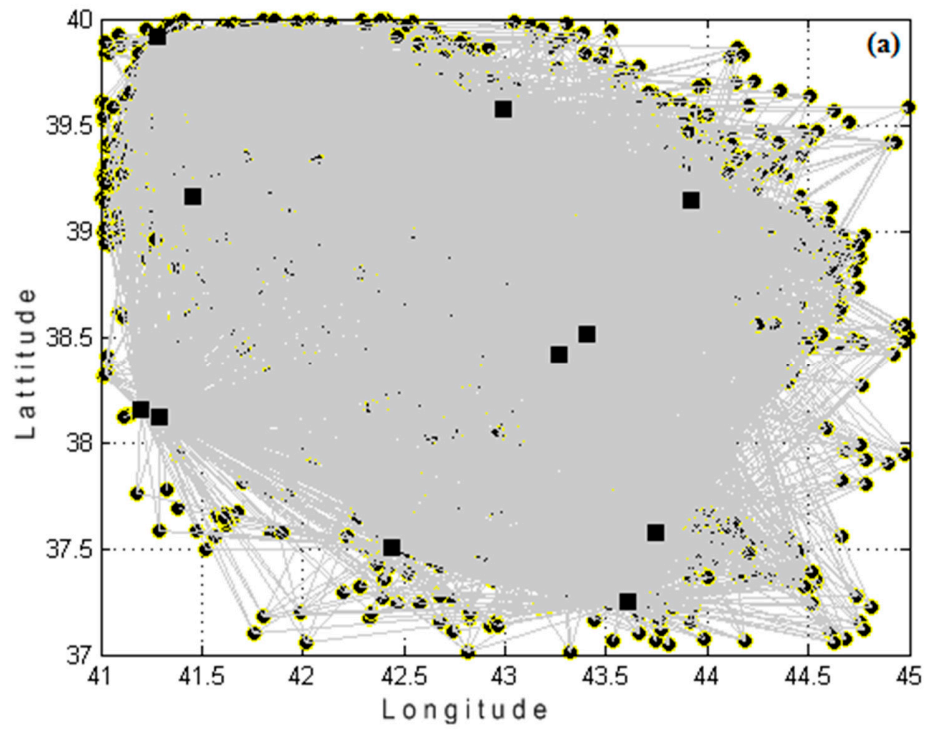

**4. P-wave ray path**

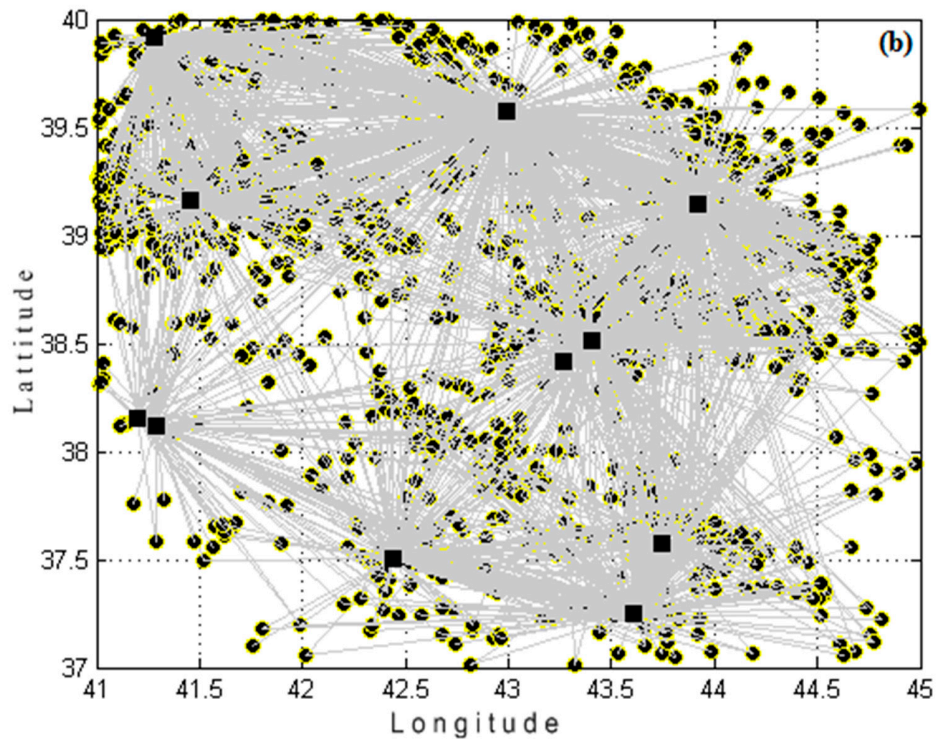

**5. S-wave ray path**

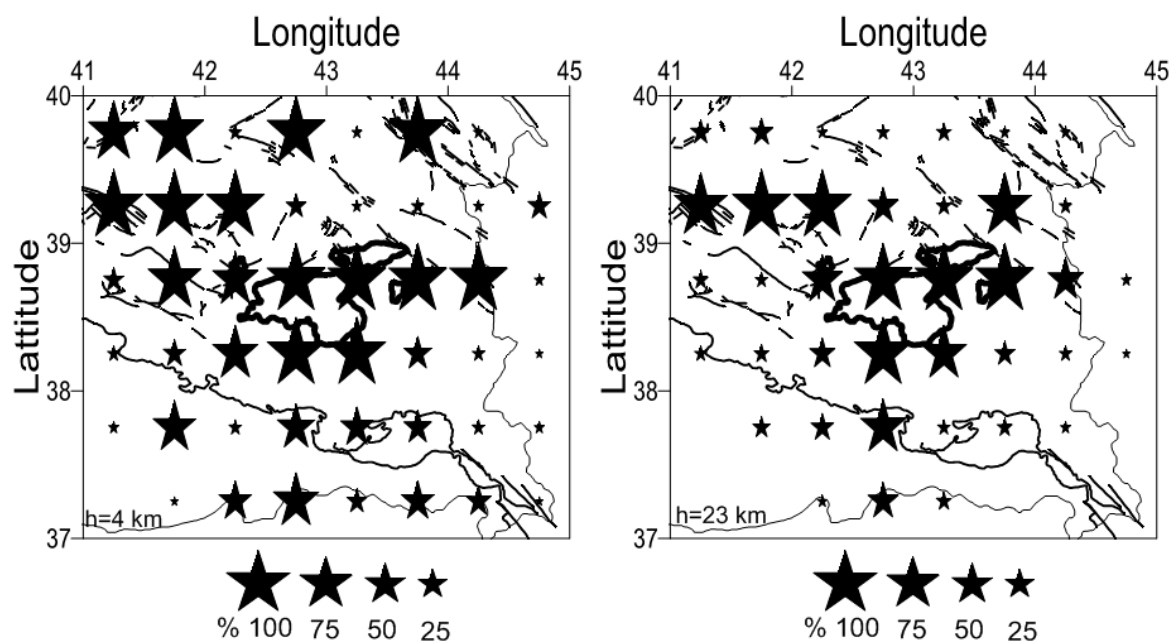

## 6. P-wave amplitude recovery

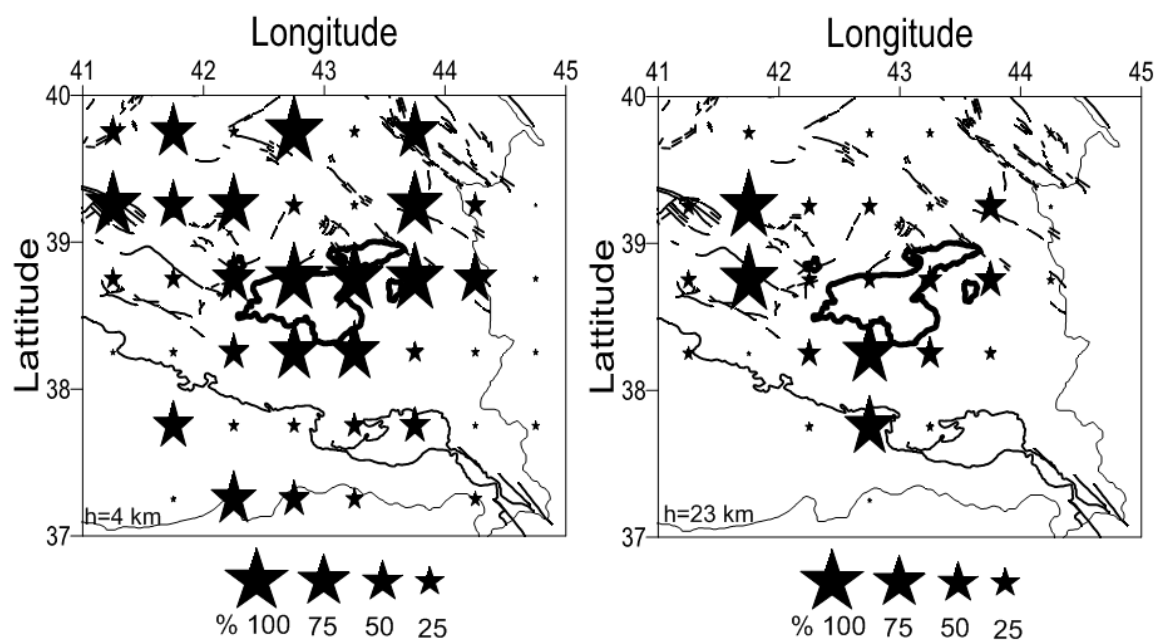

## 7. S-wave amplitude recovery

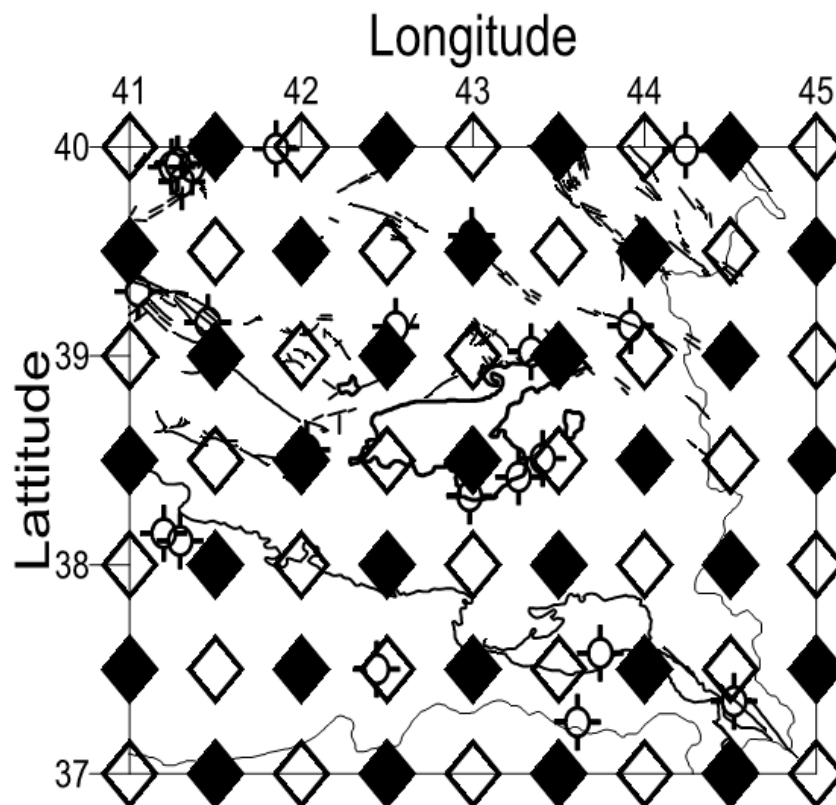

8. The input checkerboard synthetic model

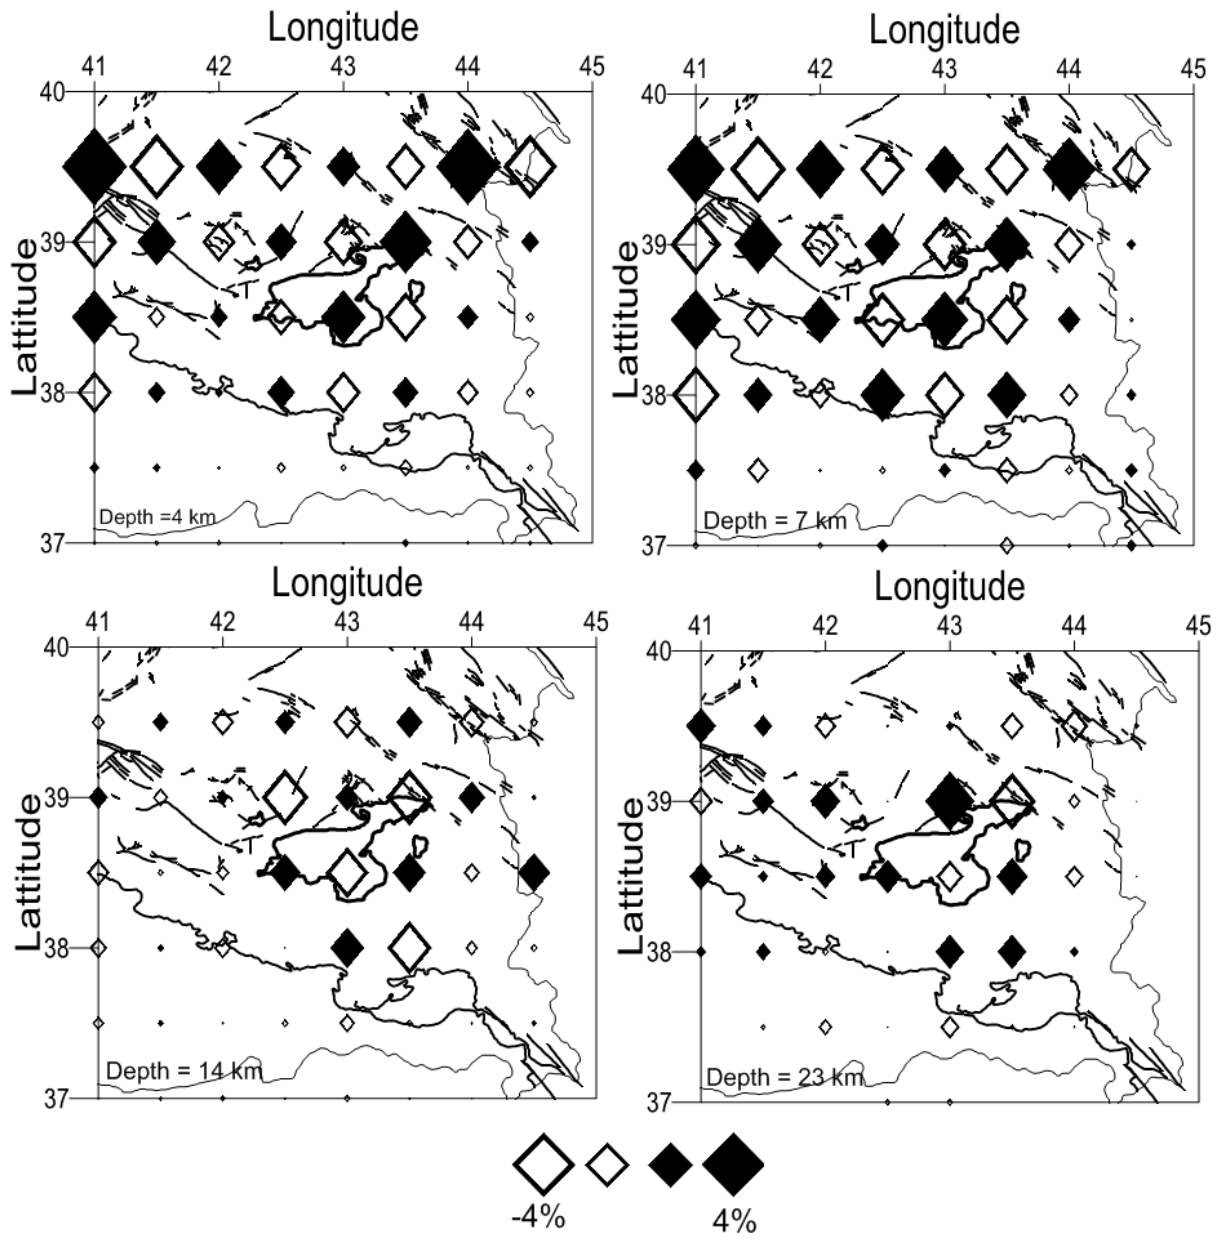

9. The results of the checkerboard resolution test for P-wave velocity

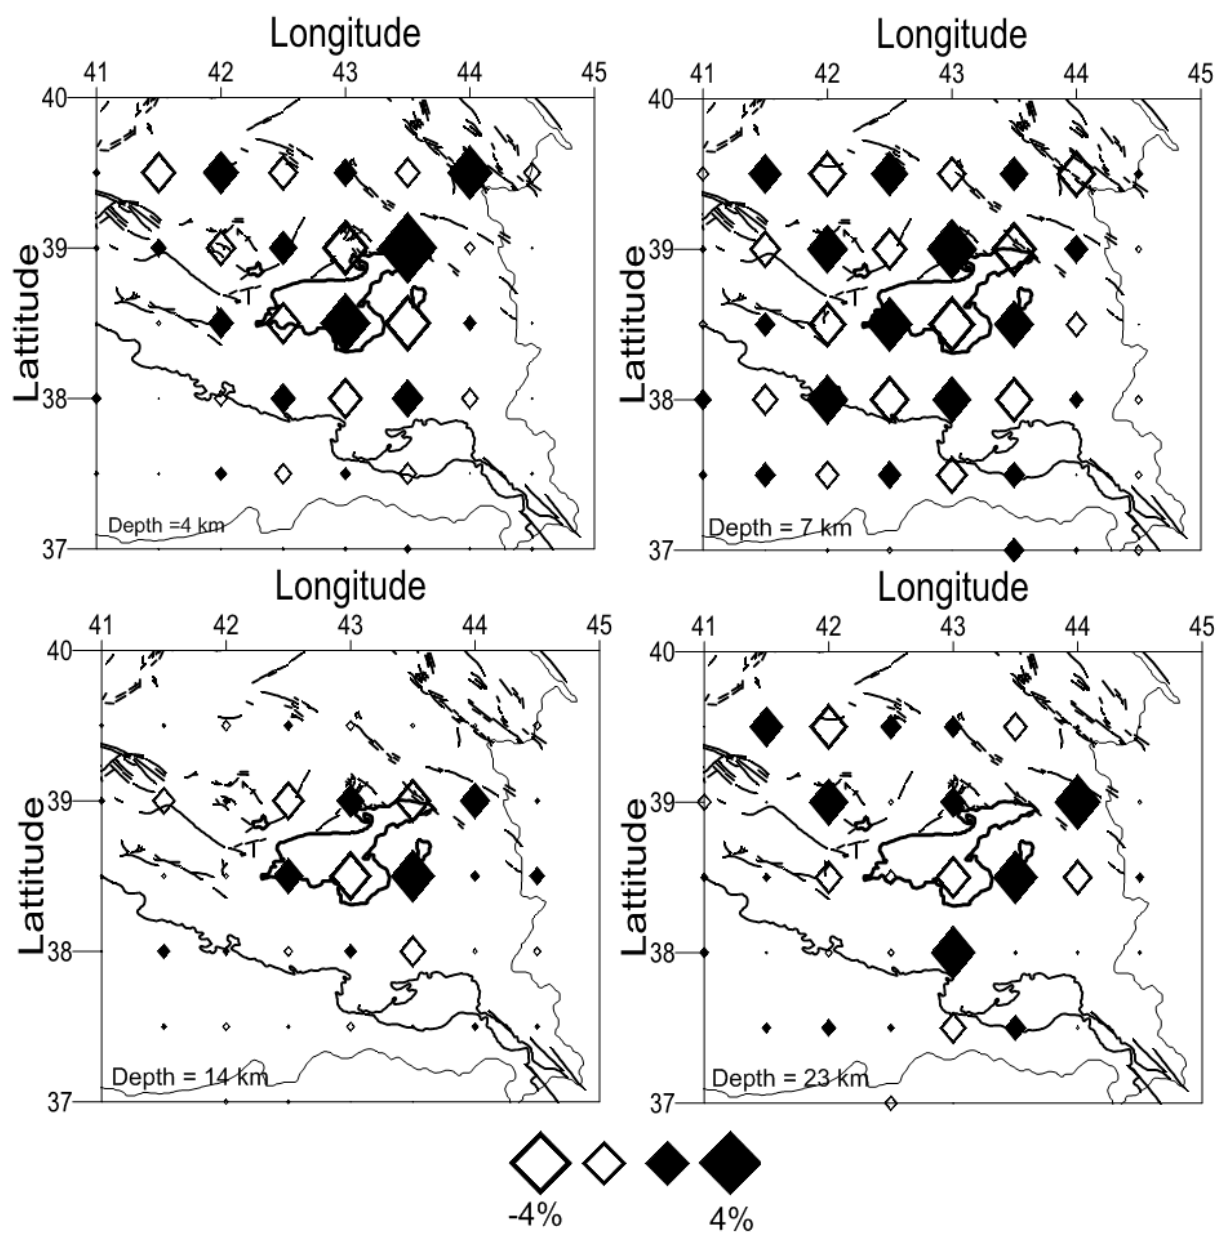

10. The results of the checkerboard resolution test for S-wave velocity
